# Supplementary material for: Estimating Pack-Year Eligibility for Lung Cancer Screening Using 2 Yes or No Questions
Source: PubMed Central journal article supplement (PMC10407683; doi:10.1001/jamanetworkopen.2023.27363), 2023-08-07
Supplement: jamanetwopen-e2327363-s001.pdf [file jamanetwopen-e2327363-s001.pdf]

## Data Sharing Statement

Rendle. Estimating Pack-Year Eligibility for Lung Cancer Screening Using 2 Yes or No Questions. *JAMA Netw Open*. Published August 07, 2023.

doi:10.1001/jamanetworkopen.2023.27363

### Data

**Data available:** Yes

**Data types:** Deidentified participant data, Data dictionary

**How to access data:** [katharine.rendle@pennmedicine.upenn.edu](mailto:katharine.rendle@pennmedicine.upenn.edu)

**When available:** With publication

### Supporting Documents

**Document types:** None

### Additional Information

**Who can access the data:** Researchers whose proposed use of the data has been approved

**Types of analyses:** For a specific purpose

**Mechanisms of data availability:** With a signed data access agreement

**Any additional restrictions:** Contingent upon local IRB approval
